# Supplementary material
Source: MDPI journal article supplement (https://www.mdpi.com/2073-4433/10/11/658)
Supplement: s1 [file s1]

## Supplementary Materials:

# Temporal Analysis of OMI-Observed Tropospheric NO<sub>2</sub> Columns over East Asia during 2006–2015

Kyung M. Han <sup>1,2</sup>

<sup>1</sup> Center for Earth and Environmental Modeling Studies (CEMOS), Gwangju Institute of Science and Technology (GIST), Gwangju 61005, Korea; [kman.han@gmail.com](mailto:kman.han@gmail.com)

<sup>2</sup> School of Earth Sciences and Environmental Engineering, Gwangju Institute of Science and Technology (GIST), Gwangju 61005, Korea

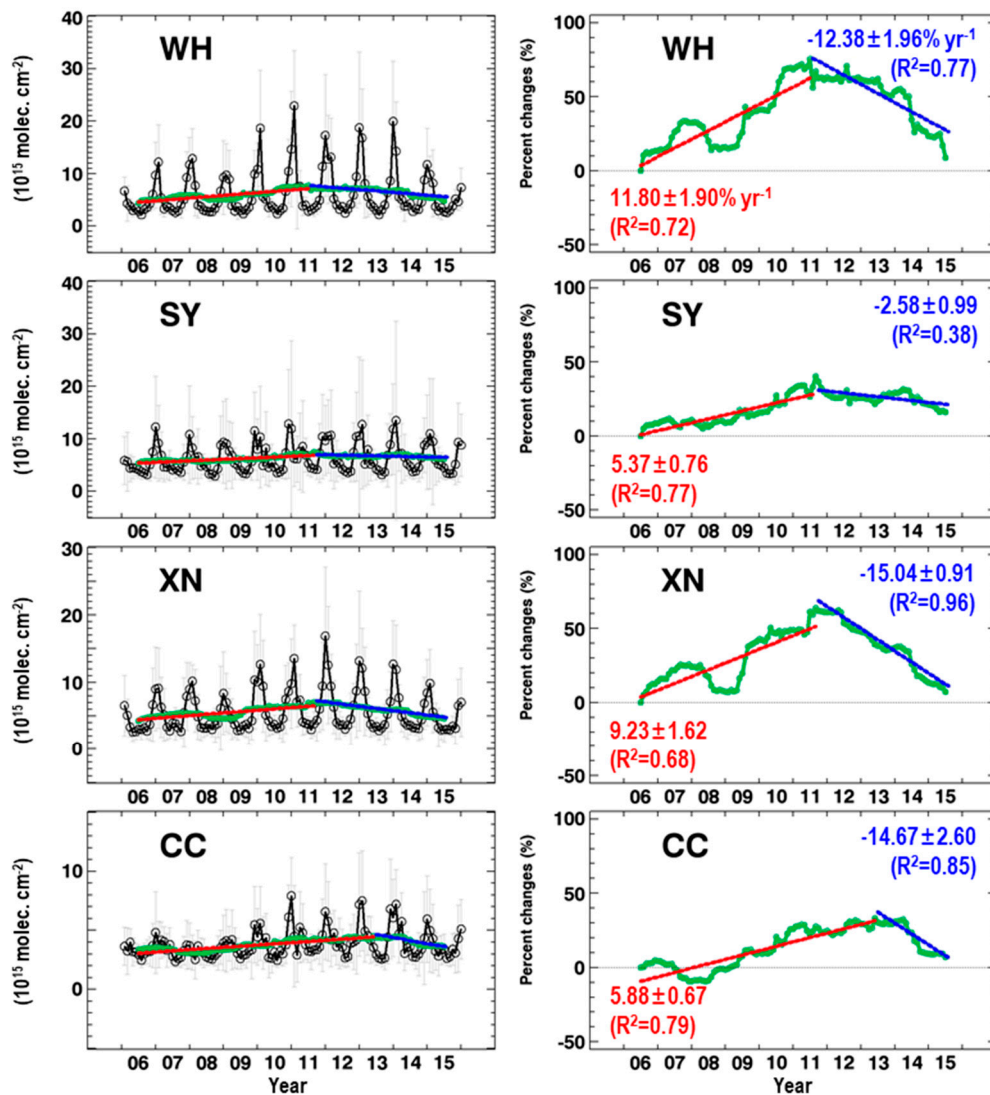

Figure S1. As Figure 3, except for WH, SY, XN, CC, TW, MG, QH, and NWP.

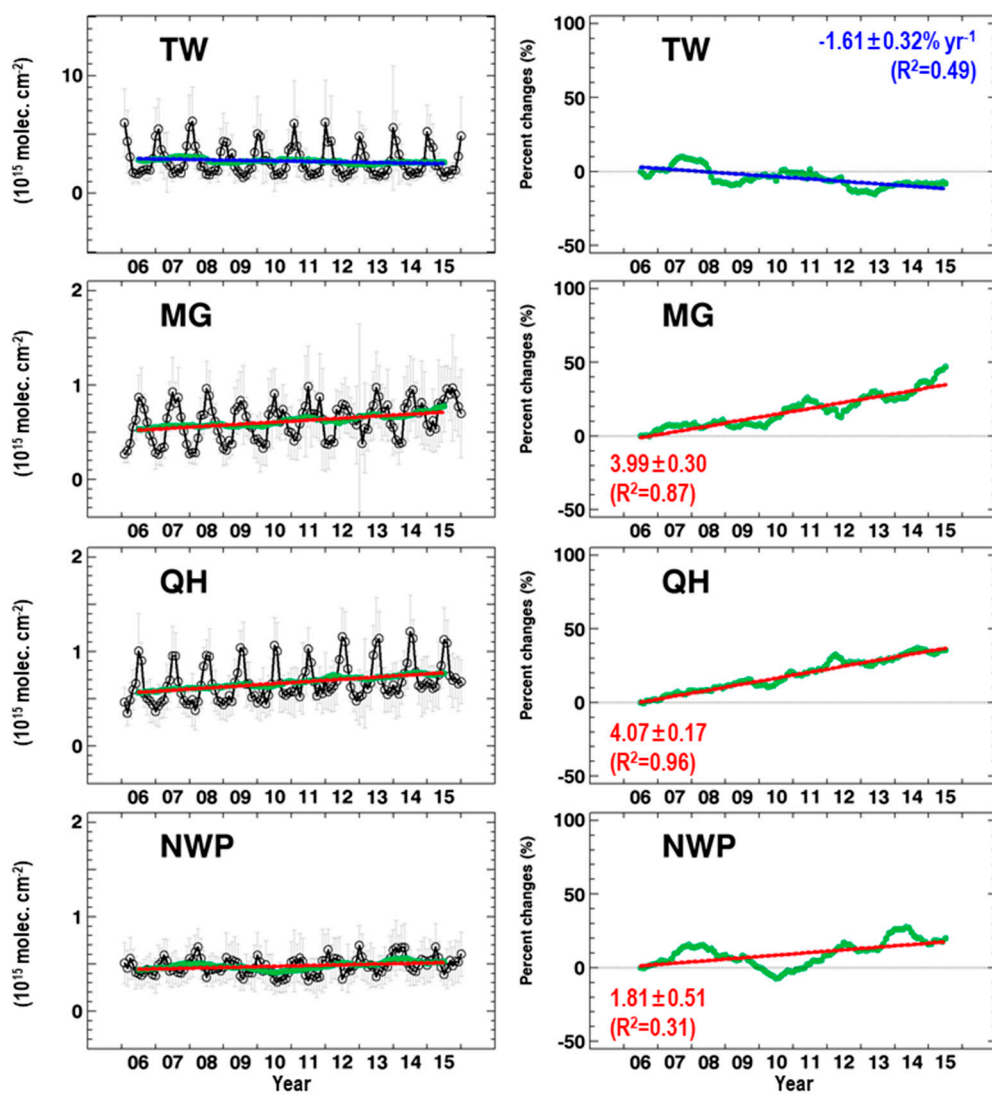

Fig. S1 (continue)

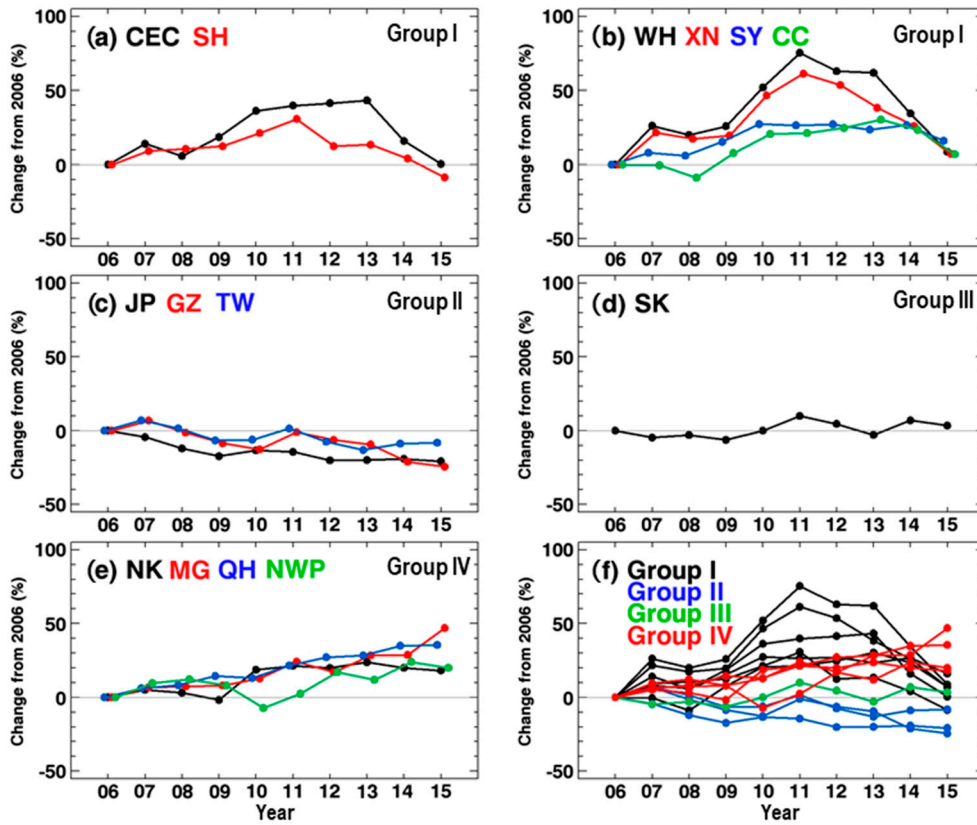

**Figure S2.** Annual variations of NO<sub>2</sub> column changes (%) from 2006 for each (a) CEC and SH, (b) WH, XN, SY, and CC, (c) JP, GZ, and TW, (d) SK, and (e) NK, MG, QH, and NWP. (f) as Figures S2 (a)–(e), except for the variations by groups defined in Table 1.

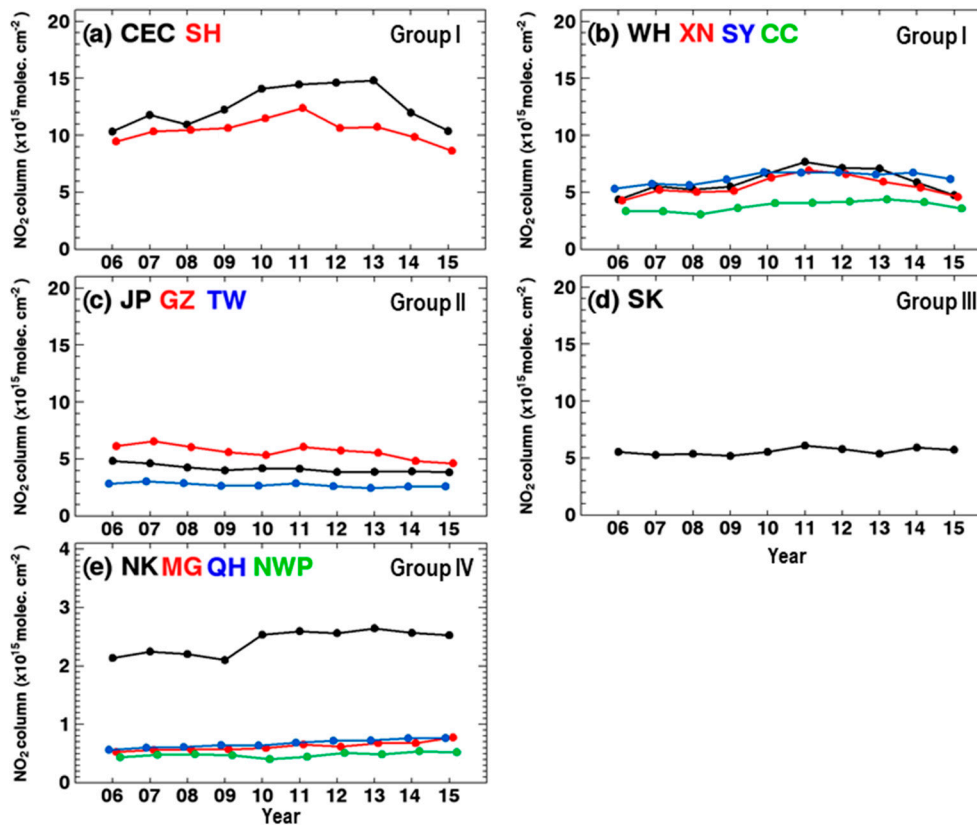

**Figure S3.** Annual variations of NO<sub>2</sub> column for (a) CEC and SH, (b) WH, XN, SY, and CC, (c) JP, GZ, and TW, (d) SK, and (e) NK, MG, QH, and NWP.

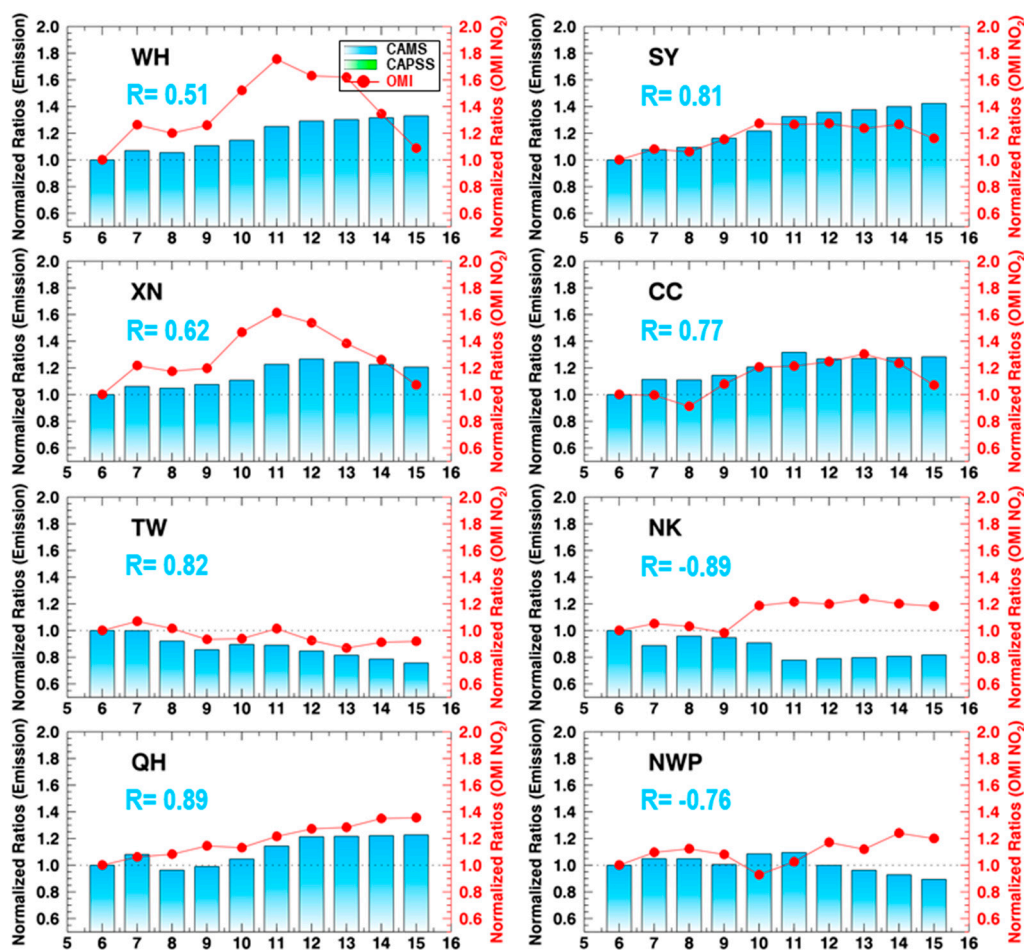

**Figure S4.** As Figure 7, except for WH, SY, XN, CC, TW, NK, QH, and NWP.

**Table S1.** Percent increasing or decreasing rates based on the 12-month moving averages.

| Groups              | Regions      | Increasing or decreasing rates <sup>1</sup><br>(% yr <sup>-1</sup> ) |                                                 | Remark<br>(turning point) |   |
|---------------------|--------------|----------------------------------------------------------------------|-------------------------------------------------|---------------------------|---|
| Up & downward trend | CEC          | 7.22±0.82 (R <sup>2</sup> =0.80)                                     | -20.29±1.25 (R <sup>2</sup> =0.97) <sup>2</sup> | Nov. 2012                 |   |
|                     | SH           | 5.25±1.11 (R <sup>2</sup> =0.62)                                     | -6.78±0.79 (R <sup>2</sup> =0.85)               | Jan. 2011                 |   |
|                     | WH           | 11.80±1.90 (R <sup>2</sup> =0.72)                                    | -12.38±1.96 (R <sup>2</sup> =0.77)              | Jun. 2011                 |   |
|                     | XN           | 9.23±1.62 (R <sup>2</sup> =0.68)                                     | -15.04±0.91 (R <sup>2</sup> =0.96)              | Aug. 2011                 |   |
|                     | SY           | 5.37±0.76 (R <sup>2</sup> =0.77)                                     | -2.58±0.99 (R <sup>2</sup> =0.38)               | Aug. 2011                 |   |
|                     | CC           | 5.88±0.67 (R <sup>2</sup> =0.79)                                     | -14.67±2.60 (R <sup>2</sup> =0.85)              | May 2013                  |   |
| Downward trend      | GZ           | -                                                                    | -2.67±0.43 (R <sup>2</sup> =0.58)               | -                         |   |
|                     | JP           | -                                                                    | -1.85±0.22 (R <sup>2</sup> =0.73)               | -                         |   |
|                     | TW           | -                                                                    | -1.61±0.32 (R <sup>2</sup> =0.49)               | -                         |   |
| Stagnant trend      | SK           | 1.12±0.40 (R <sup>2</sup> =0.23)                                     | -                                               | -                         |   |
|                     | NK           | 2.74±0.61 (R <sup>2</sup> =0.43)                                     | -                                               | -                         |   |
|                     | Upward trend | MG                                                                   | 3.99±0.30 (R <sup>2</sup> =0.87)                | -                         | - |
|                     |              | QH                                                                   | 4.07±0.17 (R <sup>2</sup> =0.96)                | -                         | - |
|                     |              | NWP                                                                  | 1.81±0.51 (R <sup>2</sup> =0.31)                | -                         | - |

<sup>1</sup> data mean ± confident level of 95%; <sup>2</sup> Correlation coefficient (R<sup>2</sup>) between the 12-month moving averages and linear trend line.
